# Supplementary material
Source: Research Square preprint supplement (doi:10.21203/rs.3.rs-8809812/v1)
Supplement: Supplementary file 1 [file 07d0f3c86583cdb20d9a4e2b.docx]

**Table S2.**  ICD-9 codes included in each diagnostic category (schizophrenia spectrum, major depressive disorder, bipolar disorder, alcohol/substance use disorder).

**ALCOHOL/SUBSTANCE USE DISORDER**

303 Alcohol Dependence Syndrome.

304 Substance dependence

305 Drug abuse without dependence

**SCHIZOPHRENIA SPECTRUM DISORDER:** 295 Schizophrenic psychosis

297 Delusional disorders

298.1 Psychosis, agitated type

298.4 Psychogenic paranoid psychosis

298.3 Acute paranoid reaction

298.8 Other and unspecified reactive psychosis

298.9 Unspecified psychosis

**BIPOLAR DISORDER:** 296.0 Bipolar I disorder, single manic episode

296.1 Mania, recurrent episode

296.4 Bipolar I disorder, more recent manic episode

296.5 Bipolar I disorder, most recent depressive episode

296.6 Bipolar I disorder, most recent mixed episode

296.7 Bipolar I disorder, most recent unspecified episode

296.8 Other and unspecified bipolar disorder

**MAJOR DEPRESSION:** 296.2 Major depression, single episode

296.3 Major depression, recurrent episode

311 Depressive disorder, not elsewhere classified
