# Supplementary material
Source: Research Square preprint supplement (doi:10.21203/rs.3.rs-8809812/v1)
Supplement: Supplementary file 2 [file 73ab90445148cb79db5399b5.docx]

**Table S1.** Results for the linear model predicting age at admission as a function of trimester, diagnosis, sex, and admission type, including all possible interactions, estimated with heteroskedasticity-consistent standard errors (HC3).

| **Effect** | ***F*-value** | ***p*-value** |
| --- | --- | --- |
| Trimester | 6.78 | **0.01** |
| Diagnosis | 14.59 | **< 0.001** |
| Sex | 9.37 | **0.002** |
| Admission type | 8.06 | **0.005** |
| Trimester × Diagnosis | 7.98 | **< 0.001** |
| Trimester × Sex | 0.37 | 0.54 |
| Diagnosis × Sex | 2.72 | **0.04** |
| Trimester × Admission type | 5.07 | **0.02** |
| Diagnosis × Admission type | 0.73 | 0.53 |
| Sex × Admission type | 1.75 | 0.19 |
| Trimester × Diagnosis × Sex | 3.17 | **0.02** |
| Trimester × Diagnosis × Admission type | 1.29 | 0.28 |
| Trimester × Sex × Admission type | 2.61 | 0.11 |
| Diagnosis × Sex × Admission type | 0.84 | 0.47 |
| Trimester × Diagnosis × Sex × Admission type | 0.70 | 0.56 |

*Notes:* Significant main effects and interactions are highlighted in bold.
